1 **A kinematic analysis of *Micrurus* coral snakes reveals unexpected variation in stereotyped**  
2 **anti-predator displays within a mimicry system**

3 Talia Y. Moore (1,2,3)\*, Shannon M. Danforth (4), Joanna G. Larson (2,3), Alison R. Davis  
4 Rabosky (2,3)

5 \*corresponding author: [taliaym@umich.edu](mailto:taliaym@umich.edu)

6 (1) Robotics Institute, University of Michigan, 2350 Hayward St, Ann Arbor, MI 48109

7 (2) Ecology and Evolutionary Biology, University of Michigan, 1105 N. University Ave,  
8 Ann Arbor, MI 48109

9 (3) Museum of Zoology, University of Michigan, 3600 Varsity Drive, Ann Arbor, MI 48108

10 (4) Mechanical Engineering, University of Michigan, 2350 Hayward St, Ann Arbor, MI  
11 48109

12 **Keywords:** *aposematism, biomechanics, coral snake mimicry, curvature, Elapidae, non-*  
13 *locomotory motion, Peruvian Amazon, snake behaviour*

14 **Abstract**

15 1. Warning signals in chemically defended organisms are critical components of predator-prey  
16 interactions, often requiring multiple coordinated display components for a signal to be effective.

17 When threatened by a predator, venomous coral snakes (genus *Micrurus*) display a vigorous,  
18 non-locomotory thrashing behaviour that has been only qualitatively described. Given the high-  
19 contrast and often colourful banding patterns of these snakes, this thrashing display is  
20 hypothesized to be a key component of a complex aposematic signal under strong stabilizing  
21 selection across species in a mimicry system.

22 2. By experimentally testing snake response across simulated predator cues, we analysed  
23 variation in the presence and expression of a thrashing display across five species of South  
24 American coral snakes.

25 3. Although the major features of the thrash display were conserved across species, we found  
26 significant variation in the propensity to perform a display at all, the duration of thrashing, and  
27 the curvature of snake bodies that was mediated by predator cue type, snake body size, and  
28 species identity. We also found an interaction between curve magnitude and body location that  
29 clearly shows which parts of the display vary most across individuals and species.

30 4. Our results suggest that contrary to the assumption in the literature that all species and  
31 individuals perform the same display, a high degree of variation persists in thrashing behaviour  
32 exhibited by *Micrurus* coral snakes despite presumably strong selection to converge on a  
33 common signal. This quantitative behavioural characterization presents a new framework for  
34 analysing the non-locomotory motions displayed by snakes in a broader ecological context,  
35 especially for signalling systems with complex interaction across multiple modalities.

## 36 **Introduction**

37           Venomous prey animals often use conspicuous phenotypes to communicate their lethal  
38 toxicity to potential predators (Ruxton 2018). These aposematic signals can be visual, chemical,  
39 acoustic, or can involve complex interactions between multiple distinct components, such as  
40 colour patterning and body motion (Rowe and Halpin 2013; Dalzeill and Welbergen). According  
41 to the theory of mimicry, toxic prey animals can reinforce the aposematic signal to their  
42 predators by converging on a common phenotype, even across multimodal components (*e.g.*,  
43 conspicuous colour and behavioural display; Müller 1878; Wallace 1867; Sherratt 2008).

44           Coral snakes are highly venomous elapid snakes in the genus *Micrurus* that have been  
45 described as a mimicry system using visual warning signals of their chemical defence (Campbell  
46 and Lamar 2004). Most coral snake species are found in the Neotropics, with the highest  
47 sympatric species richness in the Western Amazon Basin (Davis Rabosky et al. 2016a). Coral  
48 snakes are well known for their conspicuous red and black coloration (Fig. 1A), a high-contrast  
49 banding pattern that effectively creates an aposematic signal deterring avian (Smith 1975; Smith  
50 1977) and potentially mammalian predators (Green and McDiarmid 1981; Savage and Slowinski  
51 1992; Martins 1996; Buasso et al. 2006). In addition to their bright coloration, coral snakes  
52 encountering a threat also produce a distinctive anti-predator display that includes elements such  
53 as body flattening, intermittent thrashing, head hiding, and coiling of the tail, which is often  
54 elevated and waved or “waggled” (Greene 1973; Greene 1979; Fig. 1A; Supp. Video 1). In some  
55 species, this display is also accompanied by an auditory cloacal “popping” sound, eversion of the  
56 hemipenes, and emission of cloacal musk and faeces (Greene 1973; Sazima and Augusto 1991).  
57 Because such similar elements of this behavioural display have been reported across many coral  
58 snake species in both Asia and the Americas (Brown et al. 2013), this anti-predator response is

59 expected to have 1) an old origin that predates the arrival of this clade in the Western  
60 Hemisphere ~35mya and 2) a significant genetic basis like other homologous traits derived from  
61 shared ancestry (Wake et al. 2011). The main purpose of this display has been hypothesized as  
62 inducing a surprisingly effective cognitive illusion that reduces the ability of the attacking  
63 predator to identify and target the head (Roze, 1996). The intermittent, self-occluding thrashing  
64 is described as the foundational display component driving this effect in all species examined.

65         However, individual-level variation in mimicry traits is also expected to exist, with  
66 critical impacts on the ecological and evolutionary dynamics of mimicry over space and time.  
67 Variation in the banding elements of coral snake colour pattern has been well documented (Davis  
68 Rabosky et al 2016a, b) and experimentally tested using clay replicas for its effect on predator  
69 deterrence (Brodie III 1993, Buasso et al. 2006, Kikuchi and Pfennig 2010). As previous authors  
70 have noted, clay replica studies may not accurately reflect the true deterrence value of a given  
71 phenotype because they exclude behaviour (Brodie III 1993). Behavioural movement has the  
72 potential to greatly alter the perception of a colour pattern (Titcomb et al. 2013), suggesting that  
73 colour pattern and non-locomotory behaviour in coral snakes may interact to produce a complex  
74 anti-predator signal that is not fully explained by either individual component. However, neither  
75 the drivers of variation in *Micrurus* anti-predator displays nor the relationship of behaviour to  
76 colour pattern has ever been tested.

77         While snake locomotion has been quantitatively characterized in a variety of contexts  
78 (Lissmann 1950; Jayne 1986; Moon and Gans 1998; Hu et al. 2009; Socha 2011, Titcomb et al.  
79 2013), most studies of non-locomotory snake behaviours rely upon qualitative descriptions  
80 (Arnold and Bennett 1984, Brodie III 1992). Here we present the first quantitative kinematic  
81 analysis of non-locomotory anti-predator behaviours in *Micrurus* coral snakes and test for signal-

82 reinforcing similarity within and among species, as predicted by mimicry theory. By  
83 characterizing these behaviours in response to experimentally induced predator contexts, we  
84 form a functional basis for understanding both the signalling mechanism of the aposematic  
85 phenotype and the selective pressures shaping behavioural convergence among species in a  
86 mimicry system.

87

## 88 **Methods**

### 89 *Data collection*

90 All animal-related procedures have been approved by the University of Michigan  
91 Institutional Animal Care and Use Committee (Protocols #PRO00006234 and #PRO00008306)  
92 and the Peruvian government SERFOR (Servicio Nacional Forestal y de Fauna Silvestre; permit  
93 numbers: 029-2016-SERFOR-DGGSPFFS, 405-2016-SERFOR-DGGSPFFS, 116-2017-  
94 SERFOR-DGGSPFFS). We collected data during five field expeditions in the Amazonian  
95 lowlands of Peru from March 2016 to December 2018, at Villa Carmen, Los Amigos, Madre  
96 Selva, and Santa Cruz Biological Stations (Fig. 1B). We captured snakes either in funnel traps or  
97 opportunistically during transects, then transported the snakes in fabric bags secured within 20L  
98 lidded buckets back to the station. During capture and handling, all trained personnel were  
99 equipped with snake hooks, tongs, venom defender gloves (1-2-1 Products Ltd., Alfreton, UK),  
100 and knee-high rubber boots to avoid envenomation.

101 We recorded anti-predator behaviour in a pop-up behavioural arena constructed of  
102 corrugated plastic (Fig. 1C) illuminated by a string of led lights attached to the inner surface at  
103 the top edge of the arena walls (see Davis Rabosky, Moore, et al. *submitted* for more details on  
104 construction). We marked the inner surface of the arena with visual fiducial markings to aid in

105 the removal of lens distortion and measurement. We covered the inner surface of the arena with  
106 an adhesive transparent plastic film (Con-Tact, Rubbermaid) to facilitate thorough and rapid  
107 cleansing and preserve the visual fiducial markings. Since previous research has shown that  
108 snakes are physiologically affected by temperature, chemical cues, and light in an environment  
109 (Schieffelin and de Quieroz 1991), it is likely that the behaviours exhibited in laboratory  
110 environments and by captive individuals differ significantly from those exhibited under natural  
111 conditions. Therefore, we made every effort to ensure similar experimental conditions for each  
112 behavioural trial. After capture, snakes were kept undisturbed in bags for less than 24 hours  
113 before behavioural trials and the inner surface of the arena was washed with unscented soap and  
114 water to limit exposure to the chemical cues of previous experimental subjects.

115 We placed snakes into the arena, one at a time, and immediately began recording their  
116 behaviour. After the first trial, we measured surface temperature of each individual with a Raytek  
117 Raynger ST81 infrared temperature sensor. We recorded snake behaviour using either two or  
118 three GoPro (San Mateo, California) Hero 4+ Black or three Hero 5+ Black cameras filming  
119 from overhead and lateral views (see Fig. 1C for camera positions) at 30, 60, or 120 frames per  
120 second, depending on the lighting conditions.

121 We used three different stimuli to elicit anti-predator behaviours: overhead looming,  
122 pulsed vibration, and a tactile stimulus through physical contact. To simulate avian predation  
123 threat, we quickly moved a piece of cloth across the top of the arena to create the visual looming  
124 and pressure wave stimuli produced by a swooping bird. To simulate a large mammal predator,  
125 we used the vibration produced by a cellular phone and placed it in contact with the arena. To  
126 test for response after contact with a predator, we used a 1m snake hook to lightly tap the snake.

127 We randomized all treatments across individuals, and we recorded snake behaviours for up to  
128 two minutes, allowing one minute of time to rest between the trials.

129 After behavioural testing, we either vouchered snakes into the University of Michigan  
130 Museum of Zoology (UMMZ) or the Museo de Historia Natural in Lima, Peru (MUSM), or  
131 released the snake at the point of capture. All vouchered snakes were also weighed for body  
132 mass, measured for snout-vent length (SVL) and tail length, and sexed where possible. Field  
133 numbers and museum accession numbers (when available) for each individual are reported in  
134 Table 1.

135

### 136 *Video analysis*

137 We selected videos for analysis that included thrashing behaviour with minimal  
138 translocation that stayed within the field of view of one camera (Fig. 1A). We used the Adobe  
139 Premiere Pro (Adobe Systems, San Jose) built-in filter for GoPro Hero 4+ Wide angle to remove  
140 lens distortion. We wrote custom Matlab (Mathworks, Natick, Massachusetts) code to perform a  
141 projective transformation on each video frame, removing perspective to produce an image for  
142 direct measurement.

143 We used QuicktimePro 7 to watch the videos frame-by-frame and recorded the first and  
144 last frames that included motion as the start and end of each thrash. We used ImageJ to measure  
145 the length of the snake in the video image, which was compared to measurements taken at the  
146 time of vouchering. We traced the centreline of the snake body at the end of each bout of  
147 thrashing with ImageJ (Fig. 2A).

148 We wrote custom Matlab code to analyse the centreline of the snake body. First, we  
149 resampled the traced centreline to produce 500 evenly spaced points (Fig. 2B). We corrected for

150 noise in centreline tracing by smoothing the centreline using a moving average method with a  
151 span of 30 points. Each point along this smoothed centreline can be thought of as a point on the  
152 edge of a circle that provides the closest approximation to the body curvature at that point. The  
153 angle of the tangent line of this circle may differ drastically from point to point in acutely curved  
154 areas. To calculate the curvature at each point along the body, we measured the distance from the  
155 focal point to a line formed by the tenth points to the left and right (Fig. 2C). The curvature,  
156 commonly reported in radians per unit length, is a measurement of the tangent direction's  
157 sensitivity among nearby points on a curve. Higher curvature values indicate more acute curves.

158 We did not compute the curvature for the anterior and posterior extrema with fewer than  
159 ten points on a side (2% of body length). We used built-in Matlab functions to locate the areas of  
160 local maximum curvature along the body of the snake (for example, the red dot in all panels of  
161 Fig. 2). If multiple local peaks were recorded in a 30-point window, the curvatures and their  
162 indices were averaged to one point.

163 To automatically determine whether a particular curvature vector was located to the right  
164 or left of a snake's head, we wrote custom Matlab code to record the angle of each curvature  
165 vector in a snake-centreline coordinate frame. We defined the temporary snake-centreline axis as  
166 a vector pointing from the current point of interest towards its neighbouring point, in the  
167 direction closer to the head of the snake. A curvature vector falling to the left of the snake-  
168 centreline axis indicated a curve to the left of the snake's head (Fig. 2, red dot). With this method  
169 for computing curve direction, we calculated the percentage of left or right instances of local  
170 maximum curvature in each observation.

171

172 *Statistical approach*



173 To maximize our inference ability and include information from all individuals, we first  
174 assessed whether snakes displayed any anti-predator behaviour (e.g. thrashing, escaping, or head  
175 hiding) in every recorded trial of *Micrurus* behaviour as a binary variable (presence or absence  
176 of a response). For the individuals that did respond, we then assessed the expression of that  
177 response using the number of thrashing events, their durations, and the body location and  
178 direction of the curvatures in each post-thrash pose. For the purpose of statistical modelling, we  
179 calculated the sum of the magnitudes of curvature for each of the 500 points along the body of  
180 the snake for each post-thrash pose, and we quantified each individual's preference for a left or  
181 right head kink by determining the direction of the most anterior curve across multiple  
182 observations in the same trial. For each of these response variables, we constructed generalized  
183 linear mixed models (GLMMs) to test for effect of species, body size (SVL), sex, and stimulus  
184 type on the presence or expression of a response while accounting for individual collection ID as  
185 a random effect because every individual was tested more than once. For binary (Y/N) response  
186 tests of stimulus, we only included the treatments that had more than 5 observations per response  
187 category (contact, looming, and vibration), which removed 12 trials of 160 total. We also tested  
188 for the effect of collection site in the one species (*Micrurus lemniscatus*) that was collected from  
189 all localities, as there was otherwise high variability/stochasticity in which species were found at  
190 each collection site. If co-occurring species affect the anti-predator displays of individuals in a  
191 locality due to mimetic local adaptation, we would expect *M. lemniscatus* to have the highest  
192 behavioural variation because it was found sympatrically with every other species in our dataset.  
193 Finally, we tested for decay of the thrashing signal over the course of a trial by regressing thrash  
194 duration and sum of body curvature over time and assessing mean slope deviation from zero. All  
195 statistical models were built in R v 3.6.1 using the package 'lme4' (Bates et al. 2015) for mixed

196 modelling, and significance was assessed at  $\alpha=0.05$  using number of groups in each GLMM as a  
197 conservative estimate of the degrees of freedom denominator.

198 To determine the thrashing frequency for each species, we divided the total number of  
199 observed thrashing events by the total amount of time each snake in the species was observed  
200 while encountering the experimental stimulus. The total amount of time excludes trials in which  
201 no thrashing was observed. Time in which the snake left the field of view was subtracted from  
202 this total time. To then compare these metrics across species, we bootstrapped data by randomly  
203 sampling with replacement from a combined dataset comprised of all individuals in a given  
204 species. To maintain the differences in propensity to thrash, these bootstrapped values were  
205 sampled in proportion to the thrashing frequency described above.

206

## 207 **Results**

### 208 *Overall behavioural response*

209 We recorded 160 behavioural trials in total across 25 snakes: 14 trials from 3 individuals  
210 of *Micrurus annellatus*, 16 trials from 2 individuals of *M. hemprichii*, 71 trials from 12  
211 individuals of *M. lemniscatus*, 30 trials from 4 individuals of *M. obscurus*, and 29 trials from 4  
212 individuals of *M. surinamensis* (Table 1).

213 Not all individuals responded to all predator cues in our trials. We found that the  
214 probability of response depended most strongly on an additive effect of both body size (binomial  
215 GLMM;  $F_{1,22}= 5.732$ ,  $P=0.026$ ) and species ( $F_{4,22}= 5.907$ ,  $P=0.002$ ), with larger individuals and  
216 *M. surinamensis* and *M. hemprichii* least likely to respond (Fig. 3). We did not find a significant  
217 effect of collection locality (*M. lemniscatus* only, see Methods;  $F_{2,12}= 0.099$ ,  $P=0.906$ ) on the  
218 probability of response, nor significant interaction between SVL and species ( $F_{4,17}= 0.665$ ,  $P=$

219 0.625). We also found no effect of sex ( $F_{1,22} = 0.780$ ,  $P = 0.387$ ) or temperature ( $F_{1,25} = 1.474$ ,  $P =$   
220 0.236) on display probability, although we note that most of our trials were conducted across a  
221 narrow range of body temperatures between 25.1-27.8°C (q20-q80). Although our ability to run  
222 some higher order multiple regressions was limited by our sample sizes, the effect of stimulus  
223 type was marginally significant in a single fixed effect model ( $F_{2,22} = 3.278$ ,  $P = 0.057$ ) and may  
224 interact with other effects. Observationally, response to a contact stimulus produced a response  
225 in every individual tested, but the probability of response varied across species and body sizes in  
226 looming and vibration trials.

227       When analysing the thrashing display of the individuals that did respond to a predator cue,  
228 we found that thrash duration depended on body size ( $F_{1,20} = 48.075$ ,  $P < 0.001$ ) and stimulus type  
229 ( $F_{2,20} = 4.877$ ,  $P = 0.019$ ), with larger snakes and those presented with contact stimuli performing  
230 longer thrash displays. We also found that magnitude of body curvature in the post-thrash pose  
231 depended upon stimulus ( $F_{2,20} = 5.601$ ,  $P = 0.012$ ) and species ( $F_{4,20} = 5.962$ ,  $P = 0.003$ ), such that  
232 *Micrurus lemniscatus* and those presented with a looming cue displayed the highest degree of  
233 body curvature (Supp. Fig. 1). Sex had no effect on either magnitude ( $F_{1,19} = 0.212$ ,  $P = 0.651$ ) or  
234 duration ( $F_{1,19} = 2.266$ ,  $P = 0.149$ ; one unvouchered, unsexed individual excluded). We also found  
235 no effect of temperature on magnitude ( $F_{1,20} = 0.284$ ,  $P = 0.600$ ) or duration ( $F_{1,20} = 0.155$ ,  $P =$   
236 0.697). We found no significant preference within individuals for directionality (or  
237 “handedness”) in local maximum curvature, as nearly all individuals turned both heads and  
238 bodies in both directions during display (mean proportion of local maximum body curves to the  
239 right: 0.495; mean proportion of poses with right-kinked heads: 0.430, but 17/20 individuals had  
240 proportions between 0.2-0.8). We also found no significant effect of body size, species, or  
241 stimulus on the number of thrashing events within trials (all  $P > 0.05$ ). Additionally, we saw no

242 significant decay of the thrashing response over the course of trials, either in duration of thrash  
243 (mean slope: -0.003, range: -0.077 to 0.043) or degree of body curvature (mean slope: -0.288,  
244 range: -5.23 to 5.46). We did not have enough replicates to perform a robust test of locality  
245 effects.

246

#### 247 *Intraspecific variation in M. lemniscatus*

248 We compared the location and magnitude of body curvatures of the post-thrash pose  
249 among all individuals of each species. The variation among nine individuals of *M. lemniscatus*  
250 (Fig. 4) is emblematic of the intraspecific variation found in each of the other species as well (see  
251 Supp. Figs. 2-5, available online).

252 Overall, there is strikingly high consistency in thrash duration (Fig. 4A) and location and  
253 degree of body curvature (Fig. 4B) both within and among individuals of this species. Areas of  
254 highest curvature (highest peaks) are concentrated towards the anterior portion in each snake,  
255 demonstrating the stereotypical “neck kinking” mentioned in qualitative descriptions of this  
256 display. In most individuals, both sides of the body are used fairly equivalently in body curving  
257 (Fig. 4B). However, within the bounds of this stereotyped display, the ability of snakes to  
258 dynamically adjust display components across cues and ontogeny contributed to substantial  
259 intraspecific variation across all metrics. The longest duration of thrash occurred in RAB 3574  
260 (Fig. 4 A, seventh row), which was a generally active and moderately sized individual from Los  
261 Amigos. The most consistent and short durations of thrash were displayed by RAB 2415 (Fig. 4  
262 A, second row), which was generally inactive, and the smallest snake captured of this species  
263 from Santa Cruz (overall SVL effect on thrash duration also shown in Supp. Fig. 1). As seen in  
264 the second row of Fig. 4B, this individual predominantly thrashed with the anterior portion of the

265 body while keeping the rest of the body relatively stationary. There also appears to be substantial  
266 variation in how much of the anterior body displays the acute curves most associated with the  
267 neck, as well as how much of the posterior body displays the acute curves associated with tail  
268 coiling (not analysed here; see in particular RAB 3573 and 3333). Overall, there appears to be a  
269 similar amount of variation in behaviour as there is in coloration (precise colour variation shown  
270 in Fig. 4B, see legend), even though both traits are expected to be under exceptionally strong  
271 stabilizing selection.

272

### 273 *Interspecific variation*

274 We found a similarly high consistency across species in the major features of the thrash  
275 display: the duration of thrashing tended to be relatively short (median value below 0.5 seconds  
276 for all species; Fig. 5A) and all species tended to have the largest magnitude of curvature  
277 towards the anterior portion of the body, irrespective of substantial variation in typical coloration  
278 and patterning (Fig. 5B; see also Supp. Figs 2-5). Beyond these major features, however, we  
279 again found variation in multiple components. The difference between the mean curvature at  
280 midbody and the mean curvature at the head was highest in *M. lemniscatus* and *M. obscurus*, and  
281 lowest in *M. hemprichii* and *M. surinamensis*. Similarly, the region of higher curvature extended  
282 posteriorly from the head much further in *M. lemniscatus* and *M. obscurus* than in *M. hemprichii*,  
283 *M. surinamensis*, and *M. annellatus*. However, posterior body curving near the tail was highest  
284 in *M. obscurus*, which happens to be the species with the shortest relative tail length in our  
285 dataset. This pattern may indicate compensation for a shorter tail by involving more of the body  
286 in the thrashing display. Additionally, the variance in thrashing durations was surprising, as  
287 longer bouts of thrashing were not equally likely for all species. *Micrurus annellatus* was the

288 least likely to display for more than 1 second, *M. surinamensis* and *M. hemprichii* always  
289 displayed for less than 2 seconds, while *M. lemniscatus* and *M. obscurus* thrashing lasted up to 3  
290 seconds (Fig. 5B).

291

## 292 **Discussion**

293 By analysing the kinematics of non-locomotory coral snake anti-predator behaviours, we  
294 provide a new approach for quantitative comparison of critical signalling elements both within  
295 and among species. These results have important implications for testing theoretical expectations  
296 of mimicry systems and comparing results to other mimicry systems, such as butterflies, in  
297 which all players are chemically defended. Following theoretical predictions of these Müllerian  
298 systems, we expected to find greater behavioural similarity among sympatric species than  
299 intraspecific variation across multiple sites or even just high similarity across all individuals  
300 irrespective of species or locality. Contrary to this expectation, we found surprising diversity in  
301 1) propensity to display at all, 2) duration of thrashing, and 3) dynamics of body positions and  
302 kinematics during the display, with no clear relationship to patterns of species sympatry. In  
303 particular, we found that this signal can be dynamically adjusted across ecological contexts, such  
304 that small snakes and those under physical contact by a predator are the most likely to respond  
305 and produce the most vigorous responses.

306

307 *Ecologically relevant variation in signal construction: what matters?*

308 Our superficially paradoxical results add to mounting evidence that the drivers of trait  
309 variation in mimicry systems are not well understood (Joron and Mallet 1998; Mallet and Joron  
310 1999; Cox and Davis Rabosky 2013; Davis Rabosky et al. 2016a). Although one interpretation

311 could be that South American coral snakes are not part of a mimicry system, a more likely  
312 possibility is that the lethal levels of toxicity allow for greater trait variation due to the higher  
313 cost to predators that erroneously identify prey (Pough 1988). In particular, our results suggest  
314 that some aspects of the behavioural display – a short thrash duration and an acutely kinked neck  
315 – may be more important for effective signalling to predators than other traits, such as which  
316 direction the body curves or the degree of curvature beyond the neck. Additionally, our  
317 behavioural results provide an interesting comparison to variation in colour pattern, which is  
318 fairly extreme among species (Fig. 5B) but considered the most important trait for  
319 communicating the potential for chemical defence. More broadly, our ability to use a single  
320 method to analyse anti-predator display across a clade with a divergence date of at least 10  
321 million years (Pyron and Burbrink 2014) gives some appreciation for how long the main  
322 thrashing element of this display has been maintained within the coral snake lineage. However,  
323 our results suggest that simplistic models of signal canalization in mimicry systems may benefit  
324 from expansion that accounts for the ways in which signals can and do still vary within and  
325 among species.

326

### 327 *Challenges of studying non-locomotory behaviour in venomous coral snakes*

328         The non-locomotory movements of snakes present several unique challenges to  
329 quantitative biomechanical analyses. While many forms of snake locomotion involve either  
330 linear or roughly sinusoidal body shapes (Lissmann 1950; Jayne 1986; Moon and Gans 1998; Hu  
331 et al. 2009; Socha 2011, Titcomb et al. 2013), non-locomotory behaviours are less mechanically  
332 constrained and therefore result in a high frequency of self-occlusion. The elongate body form  
333 and high degrees of freedom conferred by the highly articulated musculoskeletal system result in

334 more acute curves than observed in other model organisms with elongate body forms (e.g.  
335 *Caenorhabditis elegans*, Padmanabhan 2012; Brown 2013). Such extreme self-occlusions make  
336 it difficult to use automated tools for passively tracing the snake centreline.

337 Furthermore, the banded colour patterns and self-mimicry by the tail of the head (Greene  
338 1973) make it difficult to identify the morphological features of a snake from an isolated video  
339 frame without context. These features likely contribute to snake fitness by making it difficult for  
340 a predator to target an attack towards the head (Brodie III 1993) and have resulted in a  
341 particularly challenging dataset for existing computer vision tools.

342 While fiduciary markers placed on the snake can aid in collecting precise kinematic data  
343 (Gart 2019), the handling required to affix such markers likely alters the behavioural response of  
344 the snake. Furthermore, the highly toxic venom of these snakes, together with impressively  
345 adhesive-resistant skin lipids (Torri et al. 2014), makes it impractical and unsafe to attempt such  
346 marking.

347 The smooth surface of the arena required for thorough cleansing resulted in lower  
348 substrate friction for the snake. Although some slipping was observed, recent studies suggest that  
349 snake motor control is independent of surface friction (Schiebel et al. 2019). Thus, we argue that  
350 our results likely reflect snake behavioural variation on more natural substrates.

351

### 352 *Future directions*

353 We demonstrate that a video-based approach can be feasibly applied to quantitatively  
354 examine the non-locomotory behaviours of snakes under semi-natural conditions. This approach  
355 facilitates ecologically relevant biomechanical inquiry with strong evolutionary impact. While  
356 we recognize that our stimuli, especially the vibratory stimulus, may not be a perfect match to



357 those provided by potential predators, at least one individual responded to every category of  
358 stimulus with an anti-predator display.

359         In addition to venomous coral snakes, distantly related snakes with varying toxicity have  
360 independently converged several times on these conspicuous colour patterns and thrashing  
361 displays (Greene 1979; Davis Rabosky et al. 2016b). Just as previous studies have leveraged a  
362 quantitative analysis of colour pattern to measure convergence and experimentally examine the  
363 effect on predation rates (Brodie III 1993; Buasso 2006), the analysis presented above enables  
364 more precise measurement of convergence and an experimental approach for determining the  
365 effect of behaviour on predation rates. Since snakes of all sizes, and consequently all ages,  
366 display vigorous thrashing behaviour in the absence of any parental care (Shine 1988), this anti-  
367 predator response has likely evolved as an innate response, with little learning over the course of  
368 a lifetime. In this case, quantitative characterization of anti-predator behaviours can be modelled  
369 as phenotypic traits to gain insight into the evolutionary processes underlying the patterns of  
370 behaviour observed in nature.

#### 371         **Author contributions**

372         TYM, JGL, and ARDR designed the experiment and collected the data. TYM, ARDR,  
373 and SMD analysed the data. TYM and ARDR wrote the main draft of the manuscript, and all  
374 authors contributed to manuscript editing and revision.

#### 375         **Acknowledgements**

376         The authors thank the many members of the University of Michigan/Peru Herpetology  
377 Expeditions for their assistance with capturing the snakes. Funding for field collection  
378 expeditions was provided by the University of Michigan to TYM and ARDR and a Packard  
379 Foundation Fellowship to Dan Rabosky. Funding for collaboration and analysis was provided by

380 a University of Michigan MCubed grant. We particularly thank Ciara Sanchez Paredes, Briana  
381 Sealey, and Erin Westeen for leading several seasons of behavioural filming in the field, and  
382 Rudi von May for collection and export permit acquisition. Peter Cerda, John David Curlis,  
383 Courtney Whitcher, Daniel Nondorf, and Molly Hirst were especially helpful labelling still  
384 frames from videos. We also thank Ashley Thompson and Timothy Renney for assistance with  
385 illustrations. The authors declare no conflicts of interest.

### 386 **Data accessibility**

387 Videos will be archived and freely available at <https://deepblue.lib.umich.edu/data>. Code  
388 to compute the curvature of the snakes is posted in a GitHub repository.

389

### 390 **References**

391 Arnold, S. J. & Bennett, A. F. (1984). Antipredator Displays in the Garter Snake. *Anim Behav*,  
392 32, 1108–1118.

393 Bates, D., Maechler, M., Bolker, B., & Walker, S. (2015). Fitting Linear Mixed-Effects Models  
394 Using lme4. *Journal of Statistical Software*, 67(1), 1-48.

395 Brodie III, E. D. (1992). Correlational Selection for Color Pattern and Antipredator Behavior in  
396 the Garter Snake *Thamnophis ordinoides*. *Evolution*, 46, 1284–1298.

397 Brodie III, E. D. (1993). Differential Avoidance of Coral Snake Banded Patterns by Free-  
398 Ranging Avian Predators in Costa Rica. *Evolution*, 47, 227–235.

- 399 Brown, A. E. X., Yemini, E. I, Grundy, L. J. Jucikas, T., & Schafer W. R. (2013). A dictionary  
400 of behavioral motifs reveals clusters of genes affecting *Caenorhabditis elegans* locomotion.  
401 Proc Natl Acad Sci USA, 110, 791–6. <http://doi.org/10.1073/pnas.1211447110>
- 402 Brown R., Siler, C. Oliveros, C, Welton, L, Rock, A., Swab, J., Van Weerd, M., van Beijnen, J.,  
403 Rodriguez, D., Jose, E., & Diesmos, A. (2013). The amphibians and reptiles of Luzon  
404 Island, Philippines, VIII: The herpetofauna of Cagayan and Isabela Provinces, northern  
405 Sierra Madre Mountain Range. *ZooKeys* 266:1. DOI:10.3897/zookeys.266.3982.
- 406 Buasso C. M., Leynaud, G. C., & Cruz, F. B. (2006). Predation on snakes of Argentina: Effects  
407 of coloration and ring pattern on coral and false coral snakes. *Stud Neotrop Fauna E*, 41,  
408 183–188. <http://doi.org/10.1080/01650520600630725>
- 409 Campbell, J. A., & Lamar, W. W. (2004). *The Venomous Reptiles of the Western Hemisphere*  
410 (First). Ithaca: Cornell University Press.
- 411 Cox, C. L., & Davis Rabosky, A. R. (2013) Spatial and temporal drivers of phenotypic diversity  
412 in polymorphic snakes. *Am Nat*, 182, E40-E57.
- 413 Dalziell, A. H., & Welbergen, J. A. (2016). Mimicry for all modalities. *Ecology Letters*, 19(6),  
414 609–619. <http://doi.org/10.1111/ele.12602>
- 415 Davis Rabosky, A. R., Cox, C. L., & Rabosky, D. L. (2016a) Mendelian inheritance of red and  
416 black pigmentation in snakes: implications for Batesian mimicry. *Evolution*, 70, 944–953.

- 417 Davis Rabosky A. R., Cox, C. L., Rabosky, D. L., Title, P. O., Holmes, I. A., Feldman, A., &  
418 McGuire, J. A. (2016b). Coral snakes predict the evolution of mimicry across New World  
419 snakes. *Nat Comm*, 7, 1–9. <http://doi.org/10.1038/ncomms11484>
- 420 Davis Rabosky, A. R., Moore, T. Y., Sánchez-Paredes, C. M., Westeen, E. P., Larson, J. G.,  
421 Sealey, B. A., & Balinski, B. A. (*submitted*) Convergence and divergence in snake anti-  
422 predator displays: A novel approach to quantitative behavioral comparison. *BiorXiv*. Doi:
- 423 Gart, S. W., Mitchel, T. W., & Li, C. (2019). Snakes partition their body to traverse large steps  
424 stably. *J Exp Biol* (Accepted manuscript). <http://doi.org/10.1242/jeb.185991>
- 425 Greene H. W. (1973). Defensive Tail Display by Snakes and Amphisbaenians. *J Herpetol*, 7,  
426 143–161.
- 427 Greene H. W. (1979). Behavioral convergence in the defensive displays of snakes. *Experientia*,  
428 35, 747–748. <http://doi.org/10.1007/bf01968221>
- 429 Greene H. W., & McDiarmid, R. W. (1981). Coral Snake Mimicry: Does It Occur? *Science*, 213,  
430 1207–1212.
- 431 Hu D. L., Nirody, J., Scott, T., & Shelley, M. J. (2009). The mechanics of slithering locomotion.  
432 *Proc Natl Acad Sci USA*, 106, 10081–10085. <http://doi.org/10.1073/pnas.0812533106>
- 433 Joron, M., & Mallet, J. L. (1998). Diversity in mimicry: paradox or paradigm? *Trends Ecol Evol*,  
434 13, 461–466.

- 435 Kikuchi D. W., & Pfennig, D. W. (2010). Predator Cognition Permits Imperfect Coral Snake  
436 Mimicry. *Am Nat*, 176, 830–834. <http://doi.org/10.1086/657041>
- 437 Lissmann H. W. (1950). Rectilinear locomotion in a snake (*Boa occidentalis*). *J Exp Biol*, 26,  
438 368–379. Retrieved from <http://jeb.biologists.org/content/26/4/368.short>
- 439 Mallet J. L., & Joron, M. (1999). Evolution of diversity in warning color and mimicry:  
440 polymorphisms, shifting balance, and speciation. *Ann Rev Ecol Syst*, 30, 201–233.
- 441 Müller F. (1878). Über die Vortheile der Mimicry bei Schmetterlingen. *Zool Anz*.
- 442 Martins M. (1996). Defensive tactics in lizards and snakes: the potential contribution of the  
443 neotropical fauna. *Anais de Etologia*, 14, 185–199.
- 444 Moon B., & Gans, C. (1998). Kinematics, muscular activity and propulsion in gopher snakes. *J*  
445 *Exp Biol*, 201, 2669–2684.
- 446 Padmanabhan V., Khan, Z. S., Solomon, D. E., Armstrong, A., Rumbaugh, K. P., Vanapalli, S.  
447 A., & Blawdziewicz, J. (2012). Locomotion of *C. elegans*: A piecewise-harmonic  
448 curvature representation of nematode behavior. *PLoS ONE*, 7, 1–11.  
449 <http://doi.org/10.1371/journal.pone.0040121>
- 450 Rowe, C., & Halpin, C. (2013). Why are warning displays multimodal? *Behavioral Ecology and*  
451 *Sociobiology*, 67(9), 1425–1439. <http://doi.org/10.1007/s00265-013-1515-8>
- 452 Roze, J.A. (1996) *Coral snakes of the Americas: Biology, identification, and venoms*. Krieger  
453 Publishing Company.

- 454 Ruxton, G. D., Allen, W. L., Sherratt, T. N., & Speed, M. P. (2018). *Avoiding Attack: The*  
455 *Evolutionary Ecology of Crypsis, Aposematism, and Mimicry* (Second). Oxford: Oxford  
456 University Press.
- 457 Savage, J. M., & Slowinski, J. B. (1992). The colouration of the venomous coral snakes (family  
458 Elapidae) and their mimics (families Aniliidae and Colubridae). *Biol J Linn Soc*, 45, 235–  
459 254.
- 460 Sazima, I. & Abe, A. S. (1991). Habits of five Brazilian snakes with coral-snake pattern,  
461 including a summary of defensive tactics. *Stud Neotrop Fauna E*, 26, 159–164.  
462 <http://doi.org/10.1080/01650529109360848>
- 463 Schieffelin, C.D. & de Queiroz, A. (1991) Temperature and defense in the common garter snake:  
464 warm snakes are more aggressive than cold snakes. *Herpetologica*, 47:230–237.
- 465 Schiebel, P. E., Rieser, J. M., Hubbard, A. M., Chen, L., Rocklin, D. Z. & Goldman, D. I. (2019).  
466 Mechanical diffraction reveals the role of passive dynamics in a slithering snake. *Proc Natl*  
467 *Acad Sci USA*, 116, 4798–4803. <http://doi.org/10.1073/pnas.1808675116>
- 468 Sherratt, T. N. *Naturwissenschaften* (2008) 95: 681. <https://doi.org/10.1007/s00114-008-0403-y>
- 469 Shine, R. (1988). Parental care in reptiles. In *Biology of the reptilia* (ed. C. Gans & R. B. Huey),  
470 pp. 276–329. New York: A. R. Liss.
- 471 Socha, J. J. (2011). Gliding flight in *Chrysopelea*: Turning a snake into a wing. *Int Comp Biol*,  
472 51, 969–982. <http://doi.org/10.1093/icb/icr092>

- 473 Smith, S. M. (1975). Innate recognition of coral snake pattern by a possible avian predator.  
474 Science, 187, 759–760. <http://doi.org/10.1126/science.187.4178.759>
- 475 Smith, S. M. (1977). Coral-snake pattern recognition and stimulus generalisation by naive great  
476 kiskadees (Aves: Tyrannidae). Nature, 265, 535–536. <http://doi.org/10.1038/265535a0>
- 477 Titcomb, G. C., Kikuchi, D. W., & Pfennig D. W. (2013). More than mimicry? Evaluating scope  
478 for flicker-fusion as a defensive strategy in coral snake mimics. Curr Zool, 60, 123–130.
- 479 Torri, C., Mangoni, A., Teta, R., Fattorusso, E., Alibardi, L., Fermani, S., Bonacini, I., Gazzano,  
480 M., Burghammer, M., Fabbri, D., & Falini, G. (2014) Skin lipid structure controls water  
481 permeability in snake molts. Journal of Structural Biology. 185(1): 9 –106.
- 482 Wake, D. B., Wake, M. H., & Specht, C. D. (2011) Homoplasy: From detecting pattern to  
483 determining process and mechanism of evolution. Science, 331(6020):1032 –1035.
- 484 Wallace A. R. (1867) Mimicry and other protective resemblances among animals. Westminster  
485 Foreign Q. Rev. 32, 1–43.

486  
487

488 **Tables**

| Species                      | Catalog Number | Field Number | Sex | SVL (mm) | Mass (g) | Locality     | Thrashing?                             |
|------------------------------|----------------|--------------|-----|----------|----------|--------------|----------------------------------------|
| <i>Micrurus annellatus</i>   | MUSM 39056     | RAB2815      | F   | 410      | 17.5     | Los Amigos   | No                                     |
| <i>Micrurus annellatus</i>   | UMMZ 246856    | RAB1144      | F   | 422      | 12.0     | Los Amigos   | Yes                                    |
| <i>Micrurus annellatus</i>   | UMMZ 248451    | RAB3275      | F   | 497      | 18.1     | Los Amigos   | Yes                                    |
| <i>Micrurus hemprichii</i>   | UMMZ 246857    | RAB1810      | M   | 740      | 86.0     | Madre Selva  | Yes                                    |
| <i>Micrurus hemprichii</i>   | MUSM 37347     | RAB2035      | M   | 617      | 52.5     | Madre Selva  | Yes                                    |
| <i>Micrurus lemniscatus</i>  | NA             | Released5    | NA  | NA       | NA       | Villa Carmen | No                                     |
| <i>Micrurus lemniscatus</i>  | NA             | Released9    | NA  | 848*     | NA       | Villa Carmen | Yes                                    |
| <i>Micrurus lemniscatus</i>  | NA             | Released12   | NA  | NA       | NA       | Villa Carmen | Not analyzed (out of frame)            |
| <i>Micrurus lemniscatus</i>  | UMMZ 246858    | RAB1993      | F   | 632      | 23.4     | Madre Selva  | Yes                                    |
| <i>Micrurus lemniscatus</i>  | MUSM 37348     | RAB2415      | F   | 372      | 6.1      | Santa Cruz   | Yes                                    |
| <i>Micrurus lemniscatus</i>  | MUSM 39057     | RAB2706      | M   | 816      | 68.9     | Los Amigos   | Not analyzed (snake hook interference) |
| <i>Micrurus lemniscatus</i>  | UMMZ 248456    | RAB2915      | F   | 688      | 34.6     | Los Amigos   | Yes                                    |
| <i>Micrurus lemniscatus</i>  | UMMZ 248457    | RAB3333      | M   | 595      | 35.0     | Los Amigos   | Yes                                    |
| <i>Micrurus lemniscatus</i>  | UMMZ 248452    | RAB3487      | F   | 632      | 28.4     | Los Amigos   | Yes                                    |
| <i>Micrurus lemniscatus</i>  | MUSM 39853     | RAB3573      | M   | 570      | 25.7     | Los Amigos   | Yes                                    |
| <i>Micrurus lemniscatus</i>  | MUSM 39854     | RAB3574      | M   | 590      | 25.5     | Los Amigos   | Yes                                    |
| <i>Micrurus lemniscatus</i>  | MUSM 39855     | RAB3578      | M   | 453      | 14.1     | Los Amigos   | Yes                                    |
| <i>Micrurus obscurus</i>     | UMMZ 246859    | RAB0665      | F   | 261      | 5.2      | Villa Carmen | Yes                                    |
| <i>Micrurus obscurus</i>     | MUSM 37350     | RAB0698      | F   | 237      | 5.1      | Villa Carmen | Yes                                    |
| <i>Micrurus obscurus</i>     | UMMZ 246860    | RAB1054      | M   | 775      | 81.0     | Los Amigos   | Yes                                    |
| <i>Micrurus obscurus</i>     | UMMZ 248458    | RAB3570      | F   | 766      | 86.0     | Los Amigos   | Yes                                    |
| <i>Micrurus surinamensis</i> | UMMZ 246861    | RAB1099      | F   | 657      | 100.0    | Los Amigos   | No                                     |
| <i>Micrurus surinamensis</i> | MUSM 37352     | RAB1100      | F   | 391      | 25.2     | Los Amigos   | Yes                                    |
| <i>Micrurus surinamensis</i> | MUSM 37353     | RAB1101      | M   | 421      | 32.5     | Los Amigos   | Yes                                    |
| <i>Micrurus surinamensis</i> | UMMZ 246862    | RAB1511      | F   | 948      | 240.0    | Madre Selva  | No                                     |

489

490 **Table 1:** Morphological and geographical information for the snakes examined in this study.

491 Note that the Snout-Vent Length (SVL) for *Micrurus lemniscatus* Released9 was estimated from

492 a still video frame. As snake morphometrics are taken at the time of vouchering, SVL, mass, and

493 sex were not directly measured for released individuals.

494

495



496 **Figures**

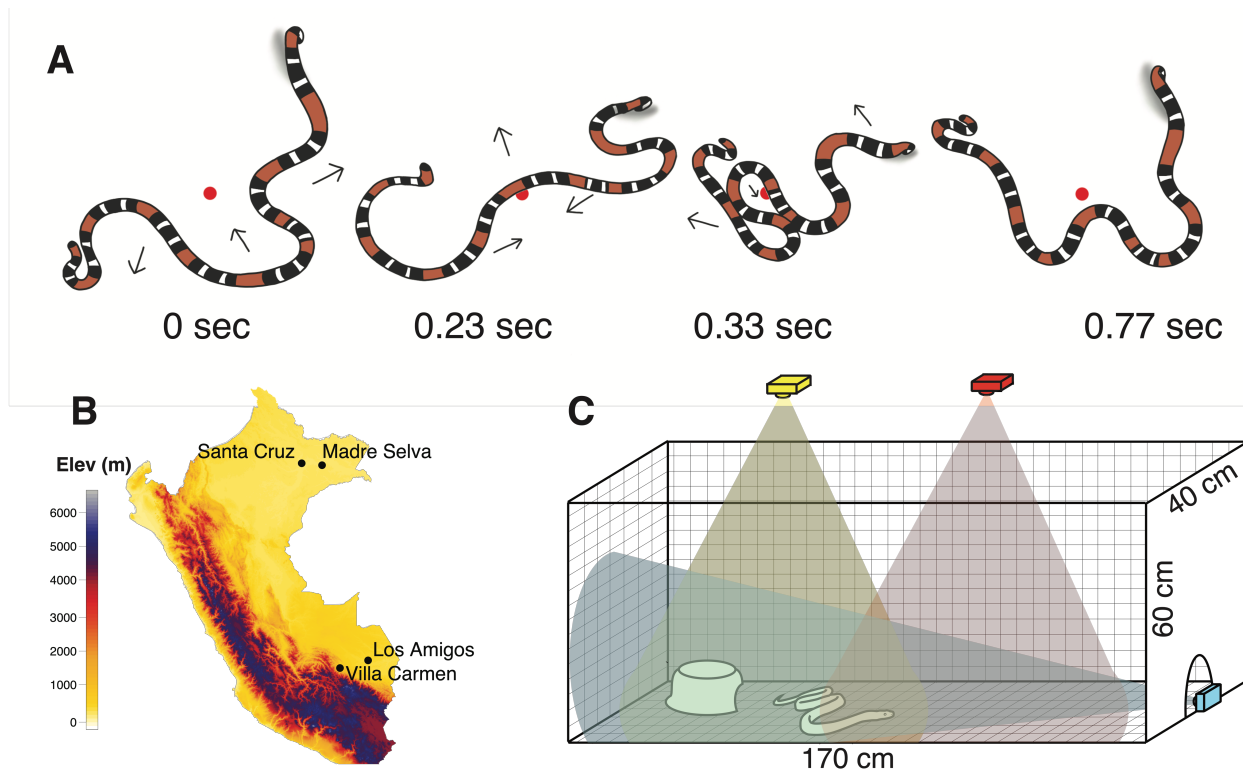

497  
498 **Figure 1:** (A) An illustration of a coral snake thashing display. Each of the four illustrations  
499 depict an individual coral snake progressing through different phases of a thashing display  
500 (based on data in this study). The snake position with respect to the red dot shows that there is  
501 negligible translocation of the snake, despite vigorous movements. The snake head is on the left  
502 side of each illustration, and the coiled tail is elevated throughout the display. (B) A map of Peru  
503 showing our four field sites, all in lowland Amazonian rainforest. (C) A schematic of the pop-up  
504 behavioural arena. The bottom and sides of the arena are constructed from corrugated plastic and  
505 connected using brass fasteners. Lines are drawn 2cm apart using permanent ink and covered  
506 with a clear adhesive plastic (Con-Tact). Three Go-Pro cameras were positioned so that their  
507 fields of view partially overlapped and included the entire floor-space of the arena. An opaque  
508 plastic bowl with a portion removed was placed in one end of the arena to provide a refuge for  
509 the snake.

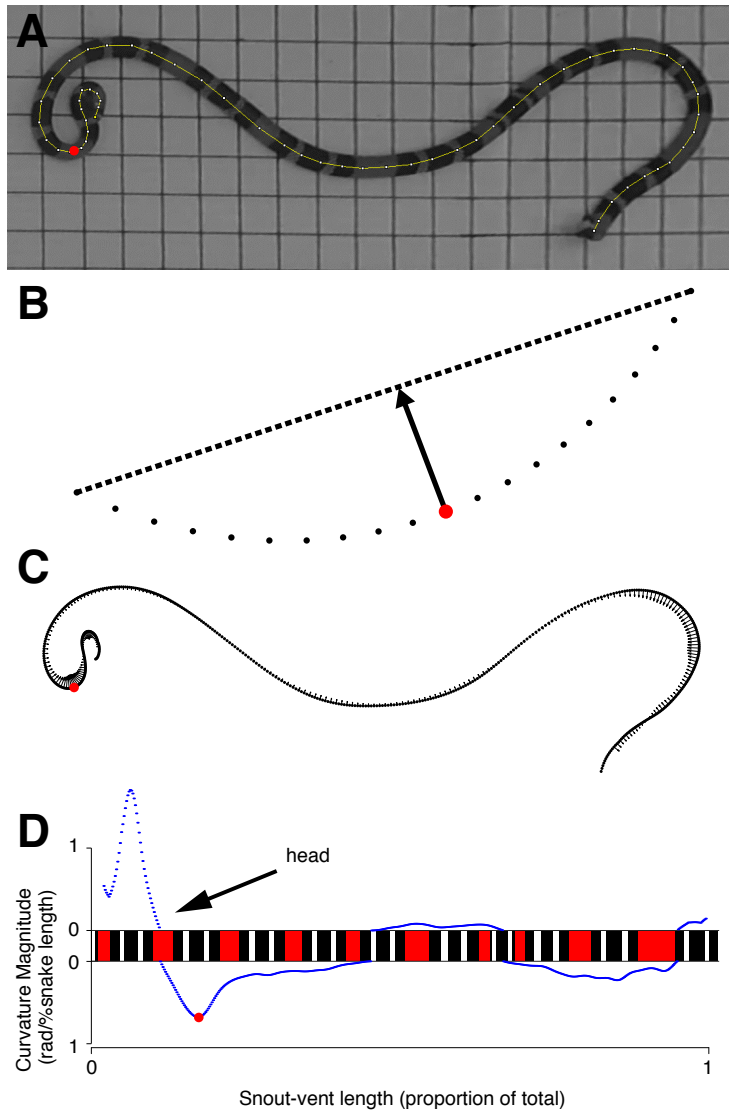

510

511 **Figure 2:** Methods for calculating the curvature of a snake. (A) Undistorted and rectified video

512 frames at the conclusion of each bout of thrashing were traced by hand in ImageJ. (B) Curvature

513 vectors are shown along each sampled point of the snake centreline as arrows. (C) For each focal

514 point in the snake centreline (the red focal point in B corresponds to the red focal point in B, the

515 curvature was calculated as the distance from the point to a line connecting the tenth points on

516 the left and right. (D) The corresponding curvature magnitudes plotted to the right and left of a

517 straightened depiction of a coral snake. The colour pattern of the coral snake reflects the

518 observed colour pattern of this individual.

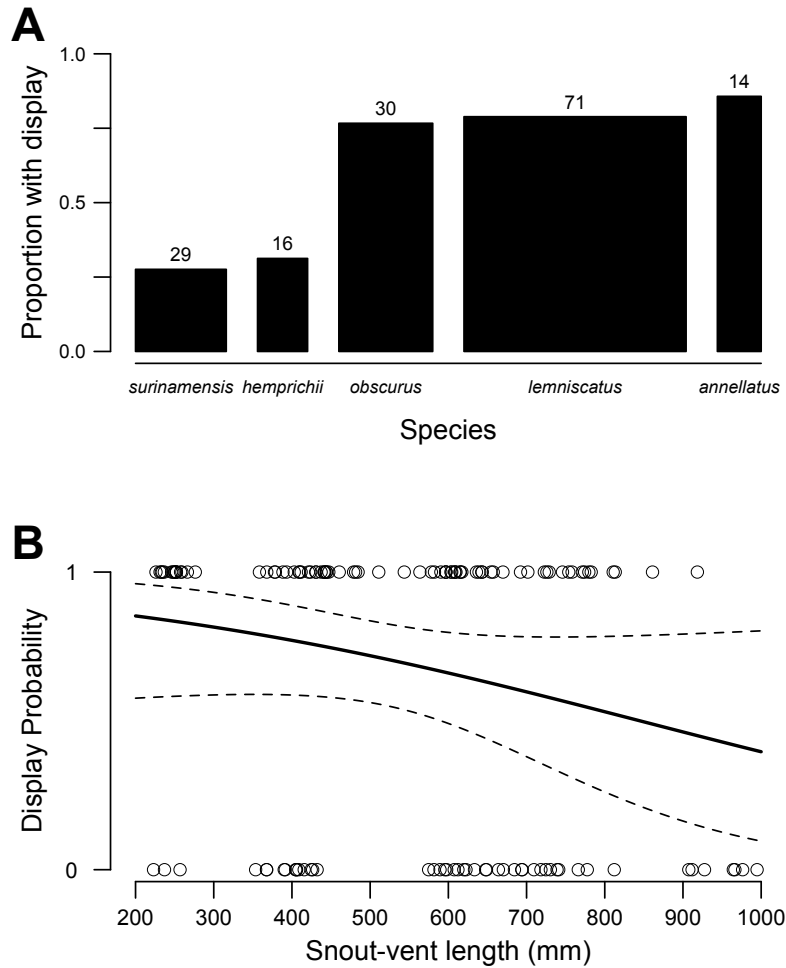

519  
520 **Figure 3.** Not all individuals performed a thrashing display in response to all cues. Display  
521 probability depended most strongly upon (A) species identity (binomial GLMM:  $F_{4,22} = 5.907$ ,  
522  $P=0.002$ ) and (B) body size as measured by snout-vent length (SVL;  $F_{1,22} = 5.732$ ,  $P=0.026$ ).  
523 Fitted effect of SVL is predicted from a model that includes collection ID as a random factor, as  
524 all individuals were tested more than once.

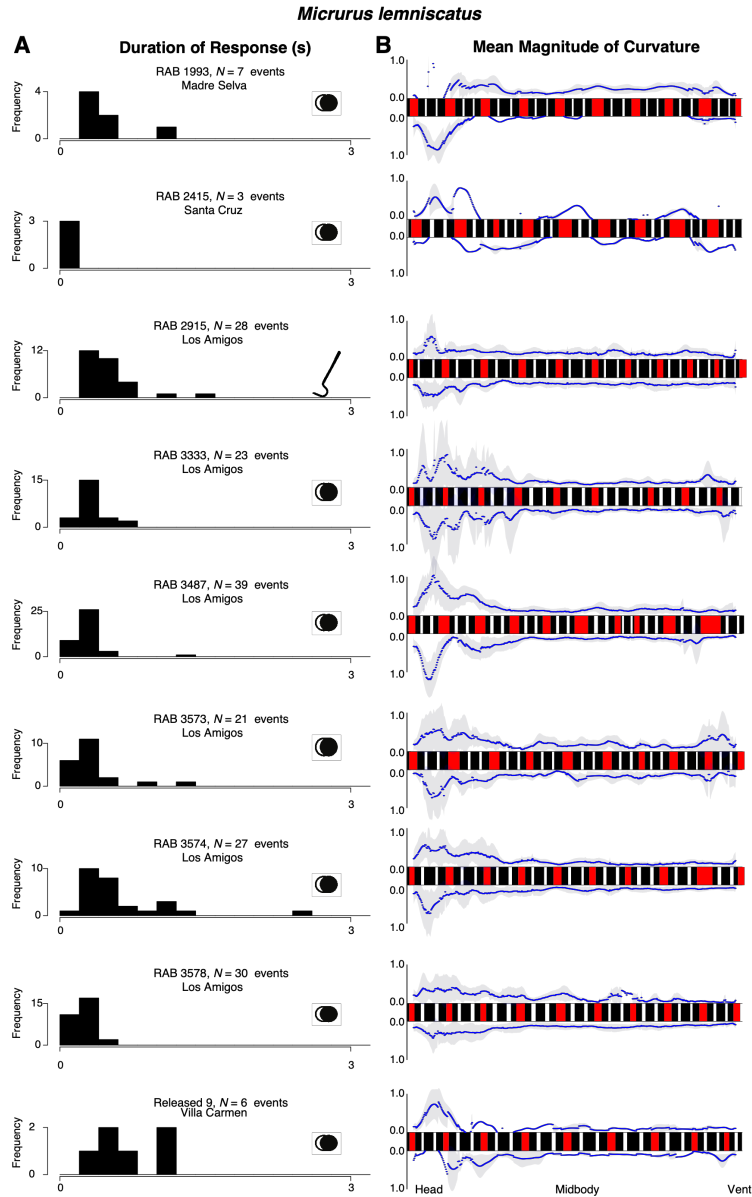

525

526 **Figure 4:** Intraspecific variation in thrash duration (A) and curvature (B) among individuals of  
527 *Micrurus lemniscatus*. For each row of plots, the histogram of thrash durations on the left and the  
528 mean magnitude of curvature plot on the right represent the same trial. The stimulus used in each  
529 trial is depicted by the icon on the right side of the histogram: two overlapping circles denote a  
530 looming stimulus and a snake hook denotes a tactile stimulus. Colour patterns of each snake  
531 reflect the observed colour patterns of each individual measured to sub-millimetre resolution.  
532 Snake patterns are arranged such that the anterior portion is towards the left.

533

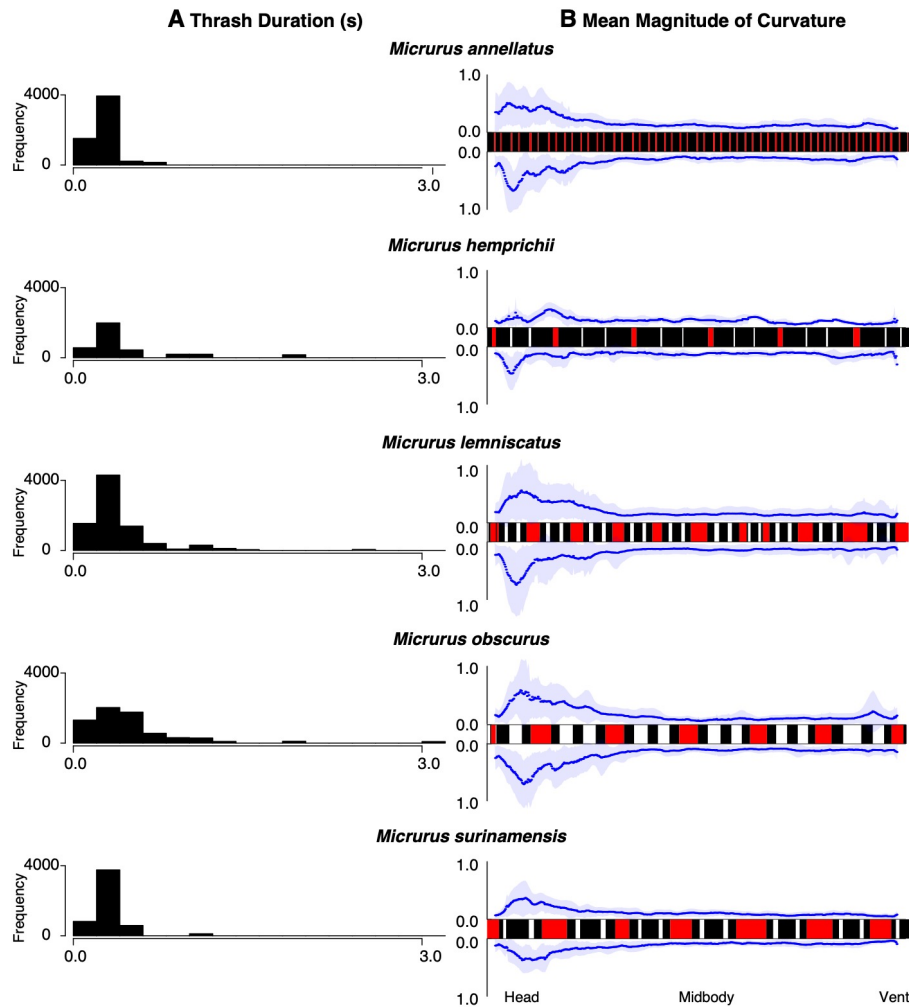

534

535 **Figure 5:** Interspecific variation in thrash duration (A) and curvature (B). Thrash durations for  
536 each species on the left are sampled with replacement proportionally by the ratio of events to  
537 total observed frames of video and plotted as histograms. On the right, the mean magnitude of  
538 curvature at each point along the body is plotted for one trial for each species in response to  
539 looming stimuli, with the exception of *Micrurus surinamensis*, which responded to a vibratory  
540 stimulus. Colour patterns of each snake reflect the observed colour patterns of each individual  
541 measured to sub-millimetre resolution. Snake patterns are arranged such that the left side is  
542 anterior.
